# Supplementary material for: BK-UM in patients with recurrent ovarian cancer or peritoneal cancer: a first-in-human phase-I study
Source: Springer Nature journal article supplement (doi:10.1186/s12885-017-3071-5), 2017-01-31
Supplement: MOESM1 [file 12029930]

1 Additional Table 1. Pharmacokinetics of BK-UM

|             |        | Level 1 |   |      |      | Level 2 |      |   | Level 3 |      |    |    |
|-------------|--------|---------|---|------|------|---------|------|---|---------|------|----|----|
| Patient no. |        | 1       | 2 | 3    | 4    | 5       | 6    | 7 | 8       | 9    | 10 | 11 |
| Day 1       | Pre-A  | -       | - | -    | -    | -       | -    | - | -       | -    | -  | -  |
|             | Post-A | -       | - | -    | -    | -       | -    | - | -       | -    | -  | -  |
|             | 1 h    | -       | - | -    | -    | -       | -    | - | -       | -    | -  | -  |
|             | 3 h    | -       | - | -    | -    | -       | -    | - | 39.6    | 24.6 | -  | -  |
|             | 6 h    | -       | - | -    | -    | -       | -    | - | 57.6    | 29.3 | -  | -  |
|             | 12 h   | -       | - | -    | -    | -       | -    | - | 42.2    | 21.8 | -  | -  |
| Day 2       | Pre-A  | -       | - | -    | -    | -       | -    | - | -       | 21.7 | -  | -  |
| Day 3       | Pre-A  | -       | - | -    | 22.1 | 132     | -    | - | -       | -    | -  | -  |
| Day 4       | Pre-A  | -       | - | -    | -    | 162     | -    | - | -       | 21.8 | -  | -  |
| Day 5       | Pre-A  | -       | - | -    | 33.2 | 160     | -    | - | -       | -    | -  | -  |
| Day 6       | Pre-A  | -       | - | -    | -    | 160     | -    | - | -       | -    | -  | -  |
| Day 9       | Pre-A  | -       | - | -    | -    | -       | 39.3 | - | -       | -    | -  | -  |
| Day 10      | Pre-A  | -       | - | 20.0 | -    | -       | 77.4 | - | -       | 22.5 | -  | -  |
| Day 11      | Pre-A  | -       | - | -    | -    | -       | 51.8 | - | -       | 22.2 | -  | -  |
| Day 12      | Pre-A  | -       | - | -    | -    | -       | 51.1 | - | -       | 21.4 | -  | -  |
| Day 13      | *      | -       | - | -    | -    | -       | 21.6 | - | -       | -    | -  | -  |

2 *Pre-A* pre-administration of BK-UM; *Post-A* post-administration of BK-UM

3 Values given as ng/mL

4 \*Sampled at the same time as day 2–12

5 - indicates below the measurable value
